# Supplementary material
Source: PubMed Central journal article supplement (PMC4394887)
Supplement: Supp_Table1.pdf [file Supp_Table1.pdf]

## Supplementary Data

SUPPLEMENTARY TABLE S1. NAMES, SYMBOLS, AND PRIMER SEQUENCES OF SELECTED GENES FOR qRT-PCR ANALYSIS

| <i>Gene name</i>                                 | <i>Gene symbol</i> | <i>Primer sequence</i>                                            |
|--------------------------------------------------|--------------------|-------------------------------------------------------------------|
| Collagen type I A1                               | COL1A1             | 5'-AGCCAGCAAGATCGAGAACAT-3'<br>5'-CGTCTCCATGTTGCAGAAGA-3'         |
| Collagen type II A1                              | COL2A1             | 5'-GGCAATAGCAGGTTACGTACA-3'<br>5'-CGATAACAGTCTTGCCCCACTT-3'       |
| Aggrecan                                         | ACAN               | 5'-AAGACAGGGTCTCGCTGCCCAA-3'<br>5'-ATGCCGTGCATCACCTCGCA-3'        |
| Matrix metalloproteinase-3                       | MMP-3              | 5'-TTTTGGCCATCTCTTCCTTCA-3'<br>5'-TGTGGATGCCTCTTGGGTATC-3'        |
| Matrix metalloproteinase-13                      | MMP-13             | 5'-CAAGGGATCCAGTCTCTCTATGGT-3'<br>5'-GGATAAGGAAGGGTCACATTTGTC-3'  |
| Matrix metalloproteinase-14                      | MMP-14             | 5'-GGACTGTCCGGAATGAGGATCT-3'<br>5'-TTGGAATGCTCAAGGCCCA-3'         |
| Hypoxanthine-guanine-phosphoribosyltransferase 1 | HPRT-1             | 5'-TGGACAGGACTGAACGGCTTGC-3'<br>5'-GCAGGTCAGCAAAGAATTTATAGCCCC-3' |
| Signal recognition particle 14kDa                | SRP-14             | 5'-TGCTGGAGAGCGAGCAGTTCCT-3'<br>5'-AGCCCTCCACGGAACCTTTCCT-3'      |

For each primer pair, the top sequence denotes the forward primer and the bottom sequence the reverse.  
qRT-PCR, quantitative reverse transcription-polymerase chain reaction.
